# Supplementary material
Source: MDPI journal article supplement (https://www.mdpi.com/2571-6131/5/4/73)
Supplement: s1 [file s1]

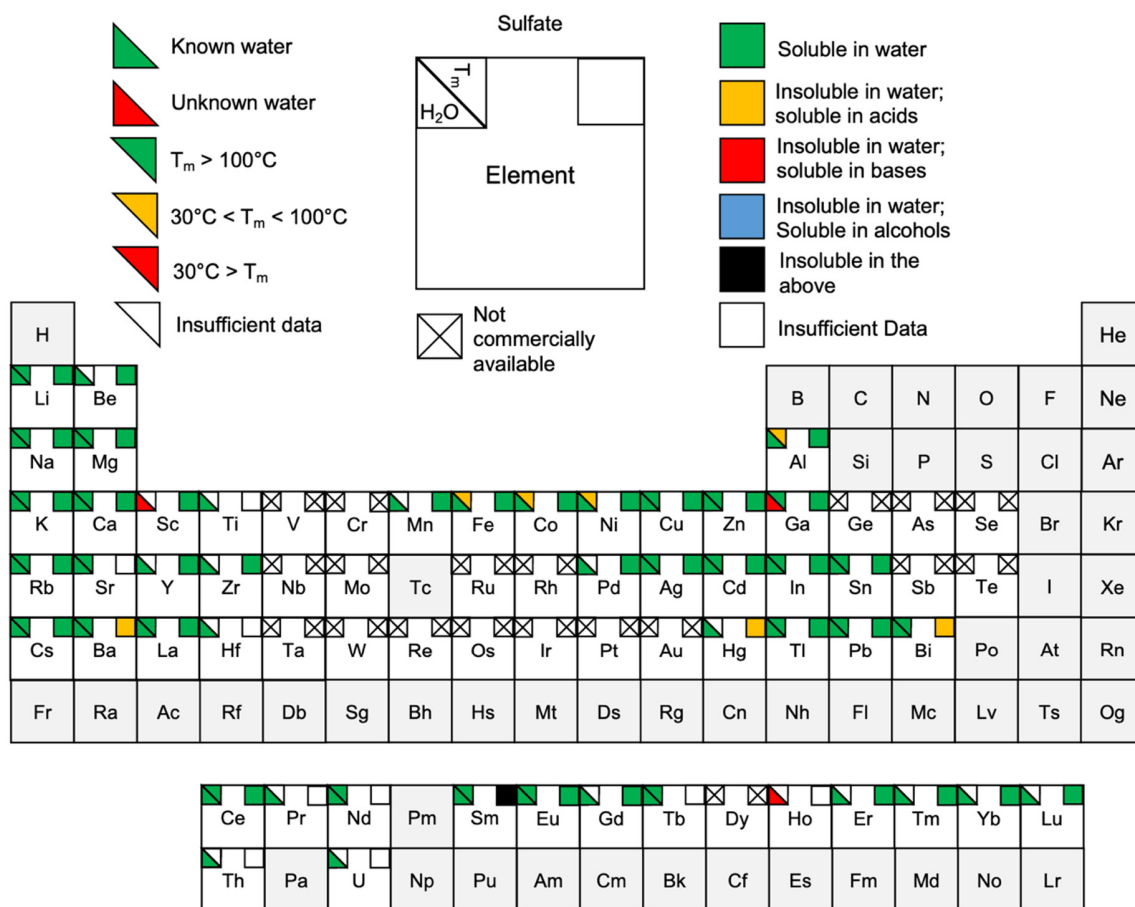

Figure S1. Periodic table of elements with hydrate, melting point, and solubility information for available metal sulfate precursors. The triangles in the top left corner in each element provides melting temperature and known hydrate information. The square in the top right corner for each element depicts the metal sulfate's solubility, be it in water, acids, bases, alcohols, or none of these solvents. Insufficient solubility data is noted.
